# Supplementary material for: Disruption of the Oral Microbiota Is Associated With a Higher Risk of Relapse After Allogeneic Hematopoietic Stem Cell Transplantation
Source: Research Square preprint supplement (doi:10.21203/rs.3.rs-512884/v1), 2021-05-19
Supplement: Supplementary file 4 [file f0a3e150320e2e88bc6115b9.xlsx]

## Sheet: Planilha1
Table 1
	N = 30
Sex (male)	16 (53%)
Age in years (median, range)	50 (19–73)
Underlying disease
Acute leukemia	18 (60%)
Other	12 (40%)
Conditioning intensity
Reduced intensity	18 (60%)
Myeloablative	12 (40%)
Total body irradiation	11 (37%)
Pretransplant T-cell depletion	15 (50%)
Graft source
Bone marrow	10 (33%)
Peripheral blood	20 (67%)
Donor
Matched sibling	9 (30%)
Haploidentical	10 (33%)
Matched unrelated	9 (30%)
Mismatched unrelated	2 (7%)
Pretransplant comorbidity (HCT-CI)
0	16 (53%)
1–2	8 (27%)
≥ 3	6 (20%)
Disease relapse index
Low–intermediate	17 (57%)
High	13 (43%)
Disease status at transplant
First or second complete remission	22 (73%)
Third complete remission	2 (7%)
Partial remission or refractory disease	6 (20%)
GVHD prophylaxis
MMF + CsA	11 (37%)
MTX + CsA	10 (33%)
MMF + CsA + PTCy	9 (30%)
Follow-up in months (median, range)	37 (25–46)
MMF, mycophenolate mofetil; MTX, methotrexate; CsA, cyclosporin A;
PTCy, post-transplant cyclophosphamide.
